# Supplementary material for: Spatiotemporal Variations and Factors of Air Quality in Urban Central China during 2013–2015
Source: MDPI journal article supplement (doi:10.3390/ijerph17010229), 2019-12-28
Supplement: s1 [file s1]

# Spatiotemporal variations and factors of air quality in urban central China during 2013–2015

## Supplementary data

Mao Mao <sup>1</sup>, Xiaolin Zhang <sup>1,\*</sup>, Yamei Shao <sup>1</sup>, Yan Yin <sup>1</sup>,

<sup>1</sup> Key Laboratory for Aerosol-Cloud-Precipitation of China Meteorological Administration, School of  
Atmospheric Physics, Nanjing University of Information Science & Technology, Nanjing 210044,  
China

\* Correspondence: xlnzhang@nuist.edu.cn

## **Data and Methods**

### **Data**

Designed as a mix of nine urban sites and one background sites for the point layout of ambient air quality monitoring, presently there are ten national automated monitoring sites in Hefei. Monitoring systems were installed and used to measure the pollutant concentrations according to China Environmental Protection Standards (HJ655-2013). The mass concentrations of PM<sub>2.5</sub> and PM<sub>10</sub> were measured using the Tapered Element Oscillating Microbalance analyzers, and levels of SO<sub>2</sub>, NO<sub>2</sub>, O<sub>3</sub> and CO were measured using the using of the ultraviolet fluorescence method, the chemiluminescence method, the UV-spectrophotometry method, and the non-dispersive infrared absorption method (or the gas filter correlation infrared absorption method), respectively. The diurnal concentrations of each pollutant were calculated only when there were more than 16 h valid data. To better study the temporal changes of pollutants, the corresponding data are divided into four seasons: spring (March–May), summer (June–August), autumn (September–November) and winter (December–February).

### **Methodology**

#### ***Hybrid Single Particle Lagrange Integrated Trajectory (HYSPLIT) model***

HYSPLIT-4 model was developed in the Air Resources Laboratory (ARL) of the National Oceanic and Atmospheric Administration (NOAA). Corresponding meteorological data with a 1° × 1° grid used in the HYSPLIT-4 model was acquired from the Global Data Assimilation System (GDAS) (<ftp://arlftp.arlhq.noaa.gov/pub/archives/gdas1/>). The backward trajectories were run four times per day at a starting times of 0:00, 06:00, 12:00, and 18:00 UTC (8:00, 14:00, 20:00, and 02:00 LT, respectively) with starting height of 500 m above ground level (agl). In order to divide the seasonal trajectories into distinct transport groups, cluster analysis was carried out on the basis of the hierarchical clustering method [1].

#### ***Potential source contribution function (PSCF)***

The zone of concern is divided into small equal grid cells ( $i \times j$ ). The PSCF value in the  $ij^{\text{th}}$  cell represents the probability of air parcel residence time and is expressed as:

$$PSCF_{ij} = \frac{m_{ij}}{n_{ij}} \quad (1)$$

where  $i$  and  $j$  denote the latitude and longitude,  $n_{ij}$  is on behalf of the total number of endpoints that fall in the  $ij^{\text{th}}$  cell, and  $m_{ij}$  represents the number of endpoints in the same cell associated with samples for which the monitored mass concentration of pollutant exceeds the criterion value in the  $ij^{\text{th}}$  cell. The GB3095-2012 PM<sub>2.5</sub> guideline value for daily average of 75 µg/m<sup>3</sup> is used as the criterion-value. To better reflect the uncertainty in cells, the PSCF values should be multiplied by an arbitrary weighting function  $W(n_{ij})$  when  $n_{ij}$  is lower than three times of average number of trajectory endpoints ( $n_{ave}$ ) in each cell [2,3], and the weight PSCF (WPSCF) is described as follows:

$$WPSCF_{ij} = \frac{m_{ij}}{n_{ij}} \times W(n_{ij}) \quad (2)$$

$$W(n_{ij}) = \begin{cases} 1.00, & 3n_{ave} < n_{ij} \\ 0.70, & 1.5n_{ave} < n_{ij} \leq 3n_{ave} \\ 0.40, & n_{ave} < n_{ij} \leq 1.5n_{ave} \\ 0.20, & n_{ij} \leq n_{ave} \end{cases} \quad (3)$$

### **Concentration-weighted trajectory (CWT) model**

Since PSCF just reflects the proportion of polluted trajectories in a cell grid, which is impossible to distinguish the contribution to the pollution levels of the target object for those who have the same PSCF value, CWT model is applied to weight trajectories with related PM<sub>2.5</sub> concentrations for better unraveling above limitation and calculating the relative contribution of different sources-areas. The geographical field is divided into grid cells representing an area of 0.5° × 0.5°. The CWT is defined as follows:

$$C_{ij} = \frac{\sum_{h=1}^M C_h \times \tau_{ijh}}{\sum_{h=1}^M \tau_{ijh}} \times W(n_{ij}) \quad (4)$$

Where  $C_{ij}$  is designed as the average weight concentration of the trajectory  $h$  in the  $ij^{\text{th}}$  cell,  $h$  represents the index of the trajectory,  $M$  represents the total number of trajectories,  $C_h$  denotes PM<sub>2.5</sub> concentrations in the trajectory  $h$  through  $ij^{\text{th}}$  cell,  $\tau_{ijh}$  is the time that trajectory  $h$  resides in the  $ij^{\text{th}}$  cell ( $i$ ,

60  $j$ ). The  $W(n_{ij})$  used in PSCF also is utilized to CWT method for reducing the uncertainty in cells.

61 The study domain is in the range of 20–60 °N and 90–130 °E, which includes more than 95% of  
62 areas covered by all the paths. The total number of endpoints in each season is about 51840, and the  
63 area covered by the trajectories is divided into 6400 grid cells ( $0.5^\circ \times 0.5^\circ$ ). Hence, each cell owns an  
64 average of 9 trajectory endpoints, that is, the  $n_{ave}$  is equal to 9. Both PSCF and CWT analysis are run by  
65 the MeteoInfo software-TrajStat Plugin.

### 66 ***Integrated exposure–response (IER) model***

67 This model is based on the assumption that the cause-specific mortality rates are independent of  
68 PM<sub>2.5</sub> concentrations. The relative risk (RR) for a specific disease due to PM<sub>2.5</sub> exposure is the ratio of  
69 the probability of an event occurring in an exposed group to the probability of the event occurring in a  
70 comparison, nonexposed group [4,5]. Adult STR (stroke, including ischemic and hemorrhagic stroke),  
71 Ischemic heart disease (IHD), lung cancer (LC) and chronic obstructive pulmonary disease (COPD),  
72 ranking top ten in the international classification, are selected as the causes of mortality. The mortality  
73 burdens attributable to ambient PM<sub>2.5</sub> exposure in 2014 and 2015 are calculated using the  
74 disease-specific mortality and Hefei population data. The RR of several causes of premature mortality  
75 ( $\Delta$ Mort) among adults including STR, IHD, LC, and COPD, are estimated according to the IER  
76 functions.

77 The RR for each disease is calculated based on equation (5):

$$78 \quad RR(C) = \begin{cases} 1 + \alpha (1 - e^{-\gamma(C-C_0)^\delta}), & C \geq C_0 \\ 1, & C < C_0 \end{cases} \quad (5)$$

79 where  $C$  is the annual PM<sub>2.5</sub> exposure concentration ( $\mu\text{g}/\text{m}^3$ );  $C_0$  is the endpoint-specific theoretical  
80 minimum-risk concentration of PM<sub>2.5</sub>;  $\alpha$ ,  $\delta$  and  $\gamma$  are parameters used to describe the shape of C–RR  
81 curves. The population attributable fraction (AF), representing the fraction of mortality for a specific  
82 disease due to PM<sub>2.5</sub> exposure, is calculated by RR factors through the formula (6):

$$83 \quad AF = (RR - 1)/RR \quad (6)$$

84 The AFs are estimated with the annual average PM<sub>2.5</sub> concentrations in 2014 and 2015 for four  
85 diseases. Formula (7) is used to calculate the  $\Delta$ Mort for a specific disease attributable to PM<sub>2.5</sub> exposure

[6,7].  $y_0$  is the baseline mortality rate caused by a specific disease, and Pop is the total population exposed to PM<sub>2.5</sub> in Hefei. The population data of Hefei in 2014 and 2015 are obtained from Hefei Statistics Yearbook.

$$\Delta \text{Mort} = y_0 \times \text{AF} \times \text{Pop} \quad (7)$$

## References

- [1] Draxler, R.R., Hess, G.D., 1998. An overview of the HYSPLIT 4 modeling system for trajectories dispersion and deposition. *Aust. Meteorol. Mag.* 47, 295–308.
- [2] Polissar, A.V., Hopke, P.K., Poirot, R.L., 2001. Atmospheric aerosol over Vermont: chemical composition and sources. *Environ. Sci. Technol.* 35, 4604–4621.
- [3] Dimitriou, K., Kassomenos, P., 2015. Three year study of tropospheric ozone with back trajectories at a metropolitan and a medium scale urban area in Greece. *Sci. Total Environ.* 502, 493–501.
- [4] Lelieveld, J., Evans, J.S., Fnais, M., Giannadaki, D., Pozzer, A., 2015. The contribution of outdoor air pollution sources to premature mortality on a global scale. *Nature* 525, 367–371.
- [5] Hu, J., Huang, L., Chen, M., Liao, H., Zhang, H., Wang, S., Zhang, Q., Ying, Q. 2017. Premature mortality attributable to particulate matter in China: Source contributions and responses to reductions *Environ. Sci. Technol.* 51, 9950–9959.
- [6] Anenberg, S.C., Horowitz, L.W., Tong, D.Q., West, J.J., 2010. An estimate of the global burden of anthropogenic ozone and fine particulate matter on premature human mortality using atmospheric modeling. *Environ. Health. Perspect.* 118, 1189–1195.
- [7] Lelieveld, J., Barlas, C., Giannadaki, D., Pozzer, A., 2013. Model calculated global, regional and megacity premature mortality due to air pollution. *Atmos. Chem. Phys.* 13, 7023–7037.

109

110 **Table S1** The attributable fractions due to PM<sub>2.5</sub> for STR, IHD, LC and COPD.

|                | PM <sub>2.5</sub><br>(µg/m <sup>3</sup> ) | Attributable Fractions (AFs) (%) |     |    |      |
|----------------|-------------------------------------------|----------------------------------|-----|----|------|
|                |                                           | STR                              | IHD | LC | COPD |
| 2014           | 89                                        | 48                               | 32  | 32 | 25   |
| 2015           | 61                                        | 44                               | 29  | 26 | 21   |
| CAAQS grade II | 35                                        | 34                               | 23  | 18 | 15   |
| WHO IT-2       | 25                                        | 25                               | 20  | 14 | 11   |
| WHO IT-3       | 15                                        | 11                               | 15  | 8  | 7    |
| WHO AQG        | 10                                        | 4                                | 10  | 4  | 3    |

111

112

113

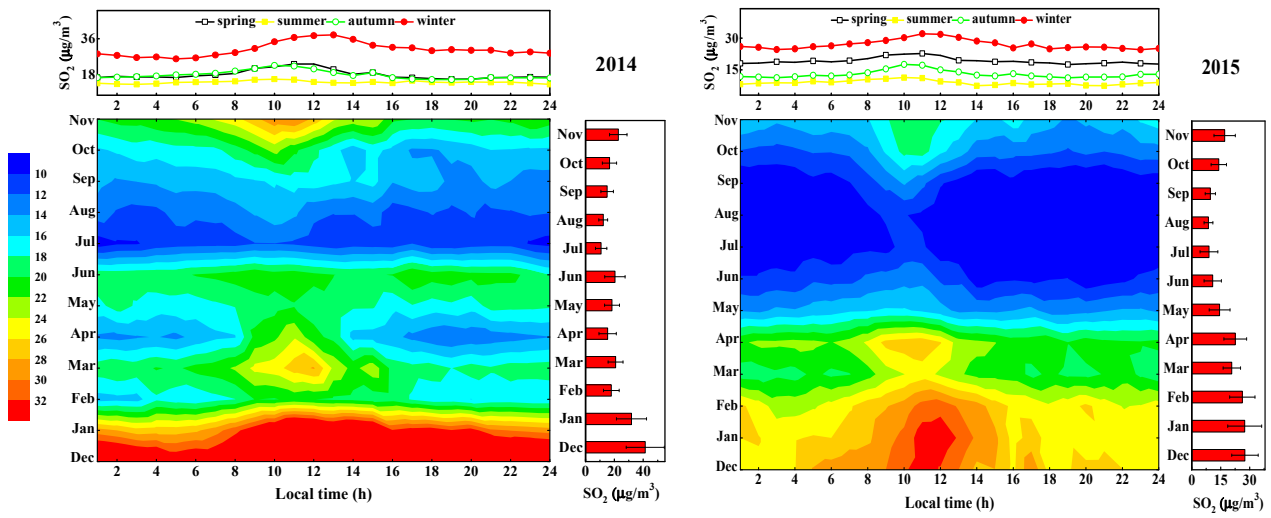

114

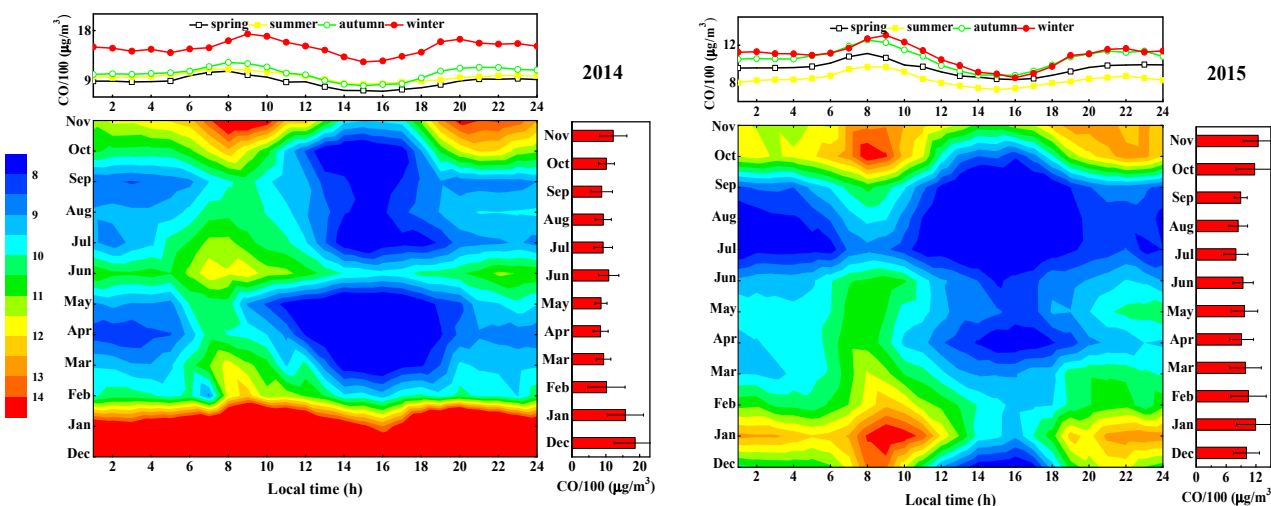

115

116 **Fig. S1.** Diurnal variations of SO<sub>2</sub> (upper) and CO (down).

117

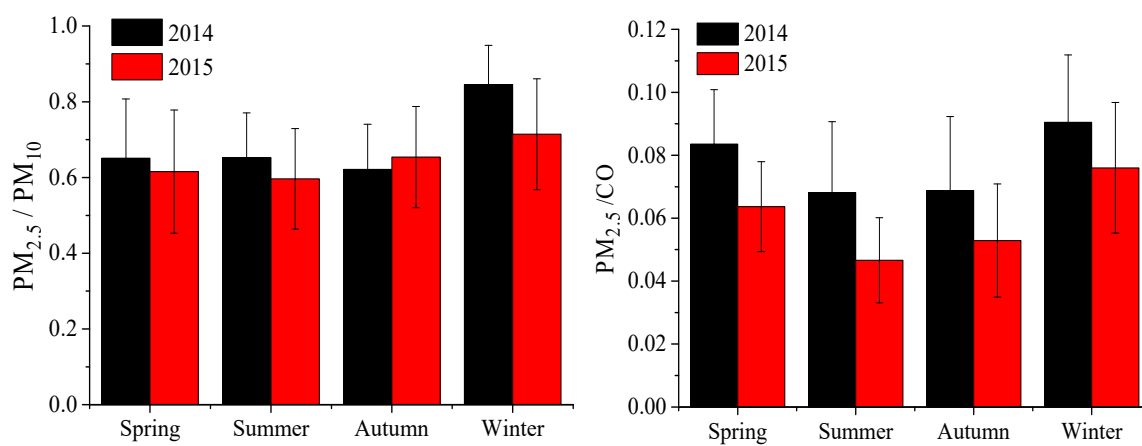

**Fig. S2.** The seasonal variations of  $PM_{2.5}/PM_{10}$  ratios and  $PM_{2.5}/CO$  ratios.



121

122

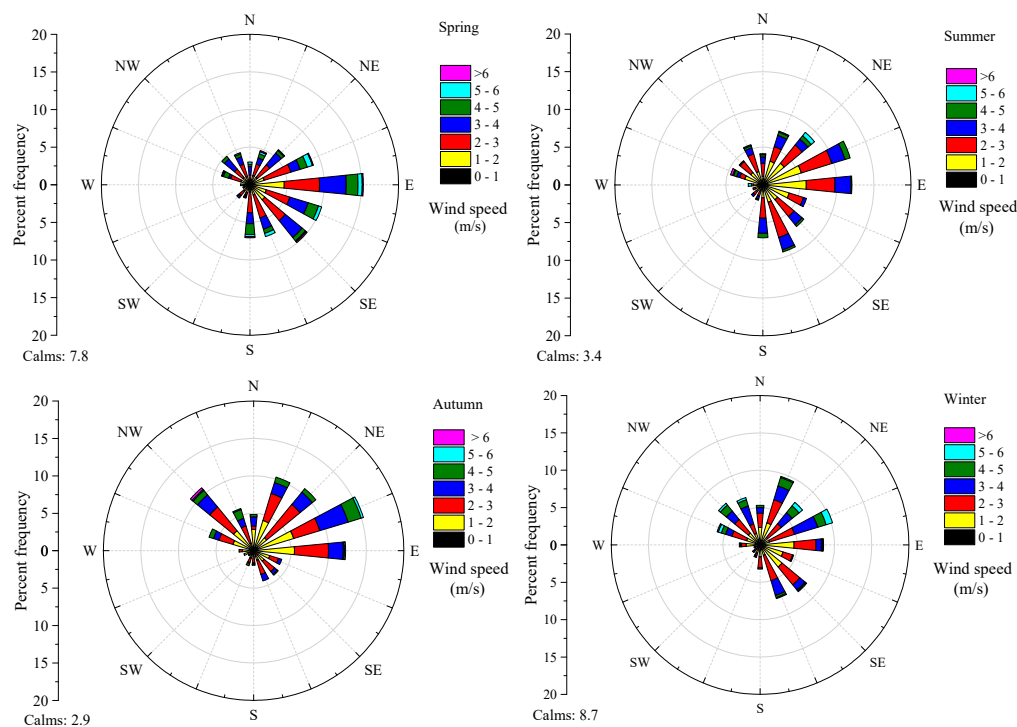

123

124

125

126

**Fig. S3.** The relationship between percent frequency and wind speed, direction for seasonal distribution in 2014 at Hefei.

127

128

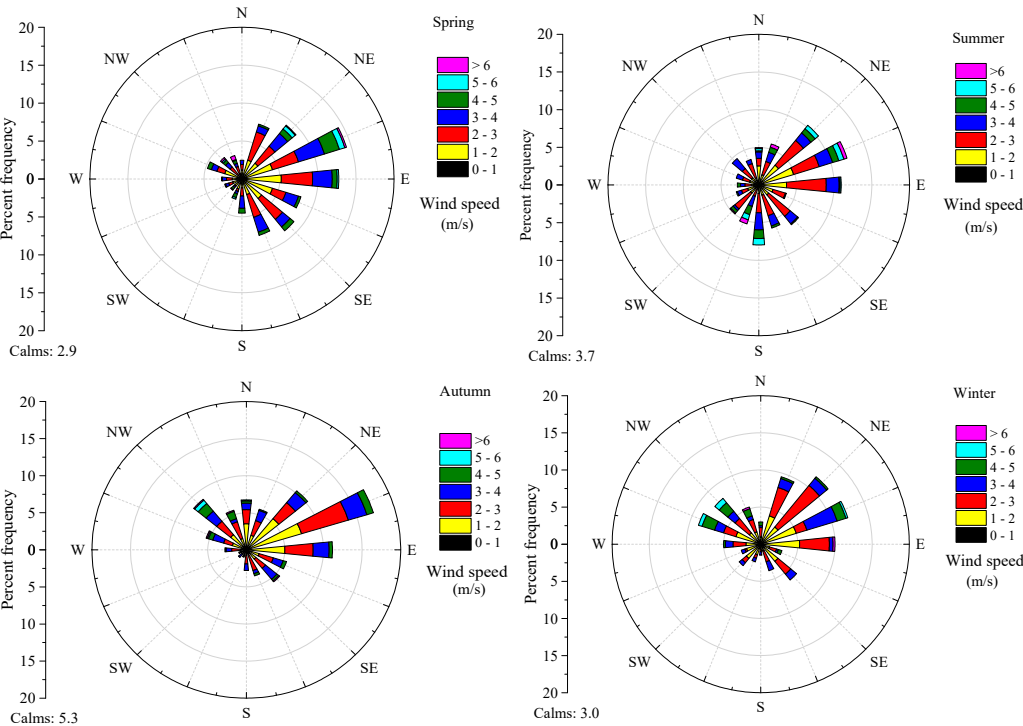

129

130

131

132

**Fig. S4.** The relationship between percent frequency and wind speed, direction for seasonal distribution in 2015 at Hefei.
